# Supplementary material for: Do Fitter Children Better Assess Their Physical Activity with Questionnaire Than Less Fit Children?
Source: MDPI journal article supplement (doi:10.3390/ijerph19031304), 2022-01-24
Supplement: s1 [file s1]

**Q1 - Are you male or female?**

☐ Male

☐ Female

**Q2 – Your date of birth**

## PHYSICAL ACTIVITY

**HARD** physical activities are jogging, team sports, fast dancing, jump-rope and any other physical activities that increase your heart rate and make you breathe hard and sweat.

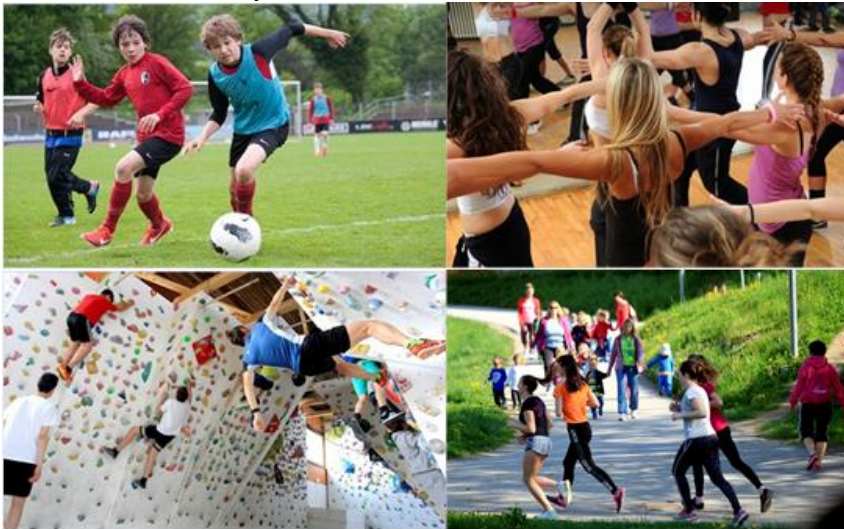

**MODERATE** physical activities are lower intensity activities such as walking, biking to school, and recreational swimming.

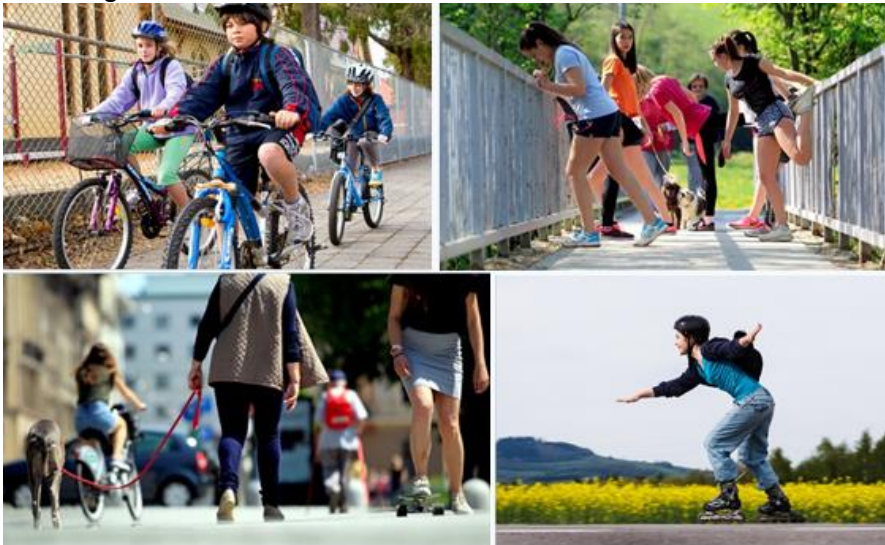

**Q3 - Mark how many minutes of HARD physical activity you did in the last 7 days. This includes physical activity during physical education class, lunch, recess, after school, evenings, and spare time.**

For example: if you did 1 hour and 15 minutes of hard activity on Monday, you will need to fill in the 1 hour circle and the 15 minute circle, as shown below:

|        | Hours                 |                                  |                       |                       | Minutes               |                                  |                       |                       |
|--------|-----------------------|----------------------------------|-----------------------|-----------------------|-----------------------|----------------------------------|-----------------------|-----------------------|
|        | 0                     | 1                                | 2                     | 3                     | 0                     | 15                               | 30                    | 45                    |
| Monday | <input type="radio"/> | <input checked="" type="radio"/> | <input type="radio"/> | <input type="radio"/> | <input type="radio"/> | <input checked="" type="radio"/> | <input type="radio"/> | <input type="radio"/> |

  

|           | . Hours               |                       |                       |                       |
|-----------|-----------------------|-----------------------|-----------------------|-----------------------|
|           | 0                     | 1                     | 2                     | 3                     |
| Monday    | <input type="radio"/> | <input type="radio"/> | <input type="radio"/> | <input type="radio"/> |
| Tuesday   | <input type="radio"/> | <input type="radio"/> | <input type="radio"/> | <input type="radio"/> |
| Wednesday | <input type="radio"/> | <input type="radio"/> | <input type="radio"/> | <input type="radio"/> |
| Thursday  | <input type="radio"/> | <input type="radio"/> | <input type="radio"/> | <input type="radio"/> |
| Friday    | <input type="radio"/> | <input type="radio"/> | <input type="radio"/> | <input type="radio"/> |
| Saturday  | <input type="radio"/> | <input type="radio"/> | <input type="radio"/> | <input type="radio"/> |
| Sunday    | <input type="radio"/> | <input type="radio"/> | <input type="radio"/> | <input type="radio"/> |

  

|           | Minutes               |                       |                       |                       |
|-----------|-----------------------|-----------------------|-----------------------|-----------------------|
|           | 0                     | 15                    | 30                    | 45                    |
| Monday    | <input type="radio"/> | <input type="radio"/> | <input type="radio"/> | <input type="radio"/> |
| Tuesday   | <input type="radio"/> | <input type="radio"/> | <input type="radio"/> | <input type="radio"/> |
| Wednesday | <input type="radio"/> | <input type="radio"/> | <input type="radio"/> | <input type="radio"/> |
| Thursday  | <input type="radio"/> | <input type="radio"/> | <input type="radio"/> | <input type="radio"/> |
| Friday    | <input type="radio"/> | <input type="radio"/> | <input type="radio"/> | <input type="radio"/> |
| Saturday  | <input type="radio"/> | <input type="radio"/> | <input type="radio"/> | <input type="radio"/> |
| Sunday    | <input type="radio"/> | <input type="radio"/> | <input type="radio"/> | <input type="radio"/> |

**Q4- Mark how many minutes of MODERATE physical activity you did in the last 7 days. This includes physical activity during physical education class, lunch, recess, after school, evenings, and spare time**

**For example: if you did 1 hour and 30 minutes of moderate activity on Monday, you will need to fill in the 2 hour circle and the 45 minute circle, as shown below.**

|        | Hours                 |                                  |                       |                       | Minutes               |                       |                                  |                       |
|--------|-----------------------|----------------------------------|-----------------------|-----------------------|-----------------------|-----------------------|----------------------------------|-----------------------|
|        | 0                     | 1                                | 2                     | 3                     | 0                     | 15                    | 30                               | 45                    |
| Monday | <input type="radio"/> | <input checked="" type="radio"/> | <input checked="" type="radio"/> | <input type="radio"/> |

  

|           | Hours                 |                       |                       |                       |
|-----------|-----------------------|-----------------------|-----------------------|-----------------------|
|           | 0                     | 1                     | 2                     | 3                     |
| Monday    | <input type="radio"/> | <input type="radio"/> | <input type="radio"/> | <input type="radio"/> |
| Tuesday   | <input type="radio"/> | <input type="radio"/> | <input type="radio"/> | <input type="radio"/> |
| Wednesday | <input type="radio"/> | <input type="radio"/> | <input type="radio"/> | <input type="radio"/> |
| Thursday  | <input type="radio"/> | <input type="radio"/> | <input type="radio"/> | <input type="radio"/> |
| Friday    | <input type="radio"/> | <input type="radio"/> | <input type="radio"/> | <input type="radio"/> |
| Saturday  | <input type="radio"/> | <input type="radio"/> | <input type="radio"/> | <input type="radio"/> |
| Sunday    | <input type="radio"/> | <input type="radio"/> | <input type="radio"/> | <input type="radio"/> |

  

|           | Minutes               |                       |                       |                       |
|-----------|-----------------------|-----------------------|-----------------------|-----------------------|
|           | 0                     | 15                    | 30                    | 45                    |
| Monday    | <input type="radio"/> | <input type="radio"/> | <input type="radio"/> | <input type="radio"/> |
| Tuesday   | <input type="radio"/> | <input type="radio"/> | <input type="radio"/> | <input type="radio"/> |
| Wednesday | <input type="radio"/> | <input type="radio"/> | <input type="radio"/> | <input type="radio"/> |
| Thursday  | <input type="radio"/> | <input type="radio"/> | <input type="radio"/> | <input type="radio"/> |
| Friday    | <input type="radio"/> | <input type="radio"/> | <input type="radio"/> | <input type="radio"/> |
| Saturday  | <input type="radio"/> | <input type="radio"/> | <input type="radio"/> | <input type="radio"/> |
| Sunday    | <input type="radio"/> | <input type="radio"/> | <input type="radio"/> | <input type="radio"/> |
